# Supplementary material for: The bromodomain inhibitor JQ1+ reduces calcium-sensing receptor activity in pituitary cell lines
Source: PubMed Central journal article supplement (PMC8345903; doi:10.1530/jme-21-0030), 2021-07-05

Scale chr10: 40 | 36,490,000 | 36,495,000 | 36,500,000 | 36,505,000 | 36,510,000 | 36,515,000 | 36,520,000 | 36,525,000 | 36,530,000 | 36,535,000 | 36,540,000 | 36,545,000 | 36,550,000 | 36,555,000 | 36,560,000 | 36,565,000 | 36,570,000 | 36,575,000 | 36,580,000 | 36,585,000 | 36,590,000 | 36,595,000 | 36,600,000 | 36,605,000 | 36,610,000 |

50 kb | mm9

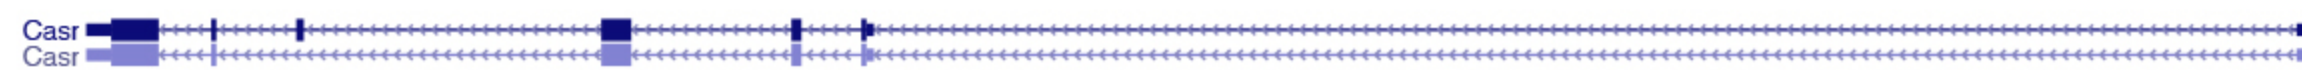

Cdb8

Input

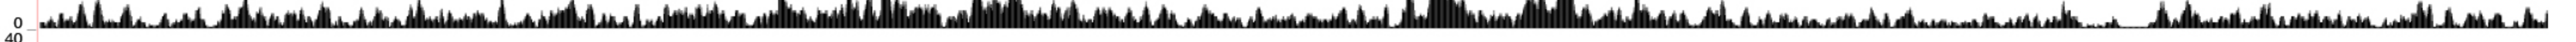

Brd2

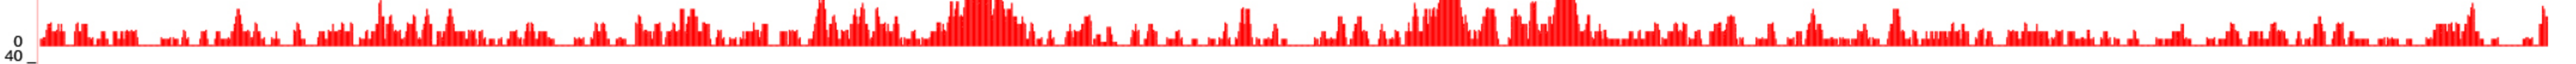

Brd3

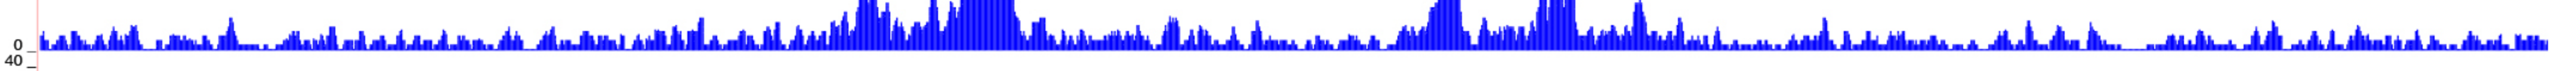

Brd4

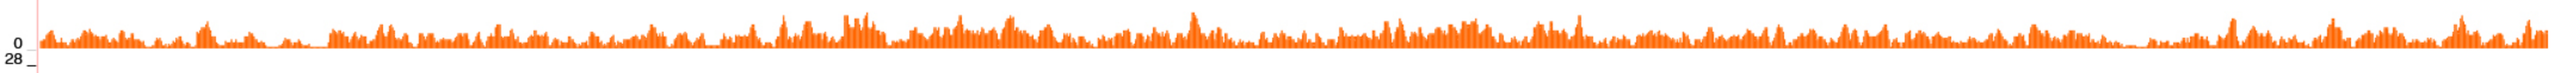

Brd2 (Input subtracted)

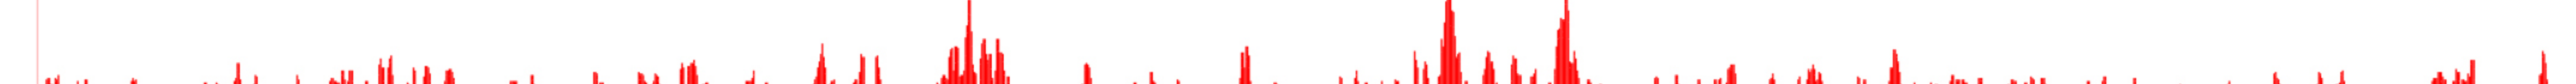

Brd3 (Input subtracted)

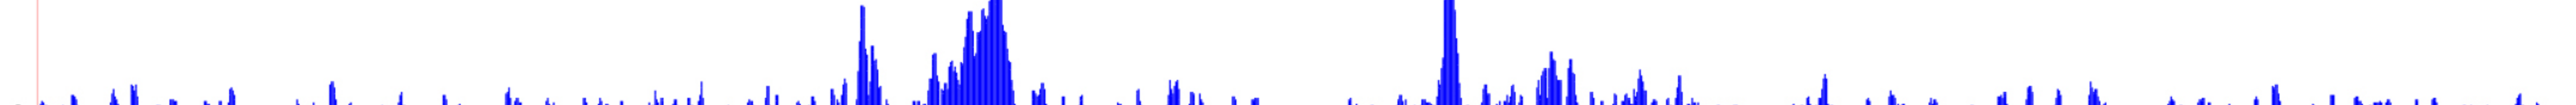

Brd4 (Input subtracted)

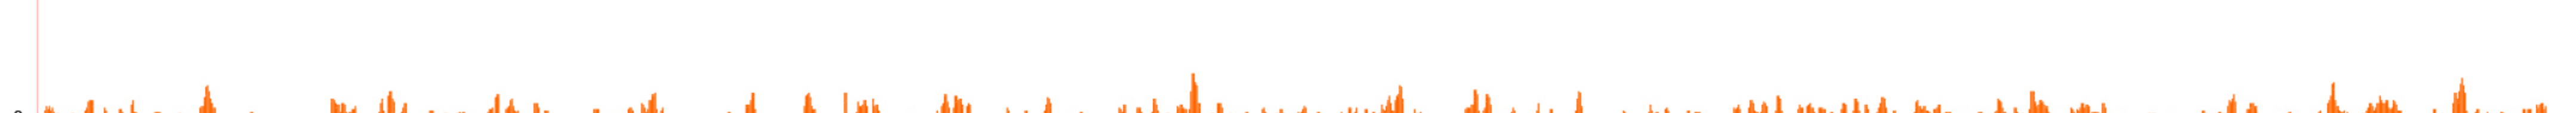

Supplement: supplementary_figure_1.pdf [file supplementary_figure_1.pdf]
