# Supplementary material for: The bromodomain inhibitor JQ1+ reduces calcium-sensing receptor activity in pituitary cell lines
Source: PubMed Central journal article supplement (PMC8345903; doi:10.1530/jme-21-0030), 2021-07-05

**A**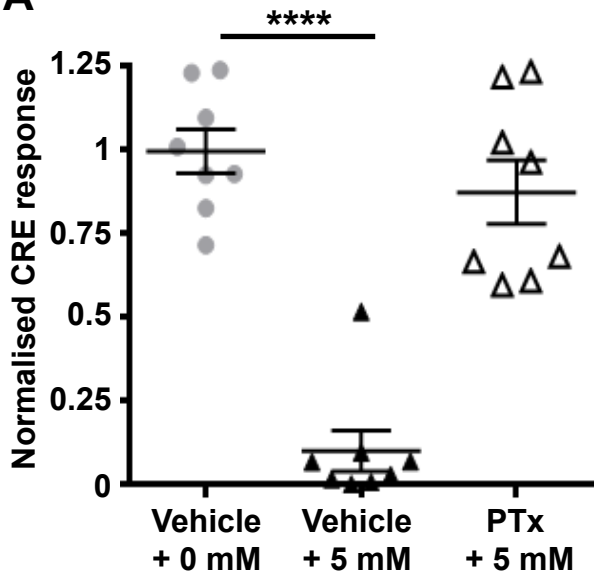**B**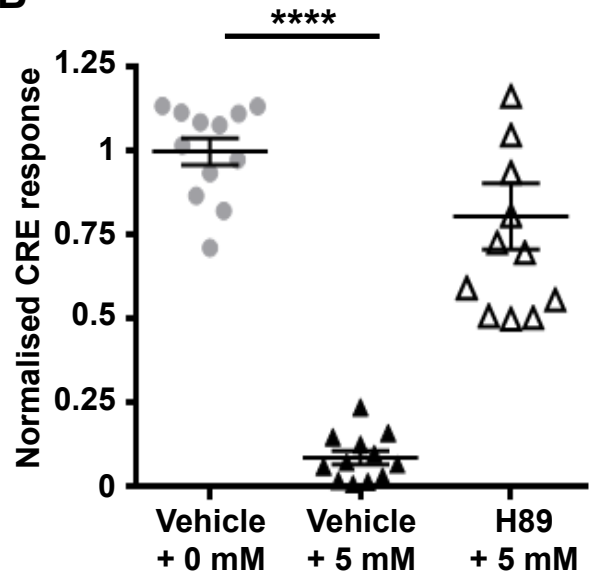

Supplement: supplementary_figure_2.pdf [file supplementary_figure_2.pdf]
