# Supplementary material for: The bromodomain inhibitor JQ1+ reduces calcium-sensing receptor activity in pituitary cell lines
Source: PubMed Central journal article supplement (PMC8345903; doi:10.1530/jme-21-0030), 2021-07-05
Supplement: supplementary_table_1.pdf [file supplementary_table_1.pdf]

1 **Supplementary Table 1**            **The 10 most highly downregulated genes in JQ1+ versus JQ-**  
2 **treated AtT20 cells, as determined by RNA sequencing**

| <b>Gene</b>          | <b>Adjusted p-value</b> | <b>Fold change</b> |
|----------------------|-------------------------|--------------------|
| <i>Kif12</i>         | 6.8933E-129             | -670.85            |
| <i>Apoa5</i>         | 8.9985E-18              | -163.36            |
| <i>Lmx1a</i>         | 2.96026E-17             | -148.89            |
| <i>Dio2</i>          | 3.9329E-208             | -78.20             |
| <i>Gm3693</i>        | 5.30346E-21             | -57.44             |
| <i>Gm26512</i>       | 2.14834E-34             | -52.41             |
| <i>Krt23</i>         | 0.00E+00                | -51.62             |
| <i>Mycs</i>          | 2.21968E-59             | -50.42             |
| <i>Mgat5b</i>        | 9.99312E-42             | -50.18             |
| <i>Kcnj11</i>        | 3.37611E-50             | -48.30             |
| <i>Samd3</i>         | 2.18071E-12             | -45.05             |
| <b><i>Casr</i></b>   | <b>2.7488E-178</b>      | <b>-43.30</b>      |
| <i>Adamtsl2</i>      | 4.7203E-212             | -40.72             |
| <i>Gsdma</i>         | 2.893E-192              | -40.14             |
| <i>Tcea3</i>         | 3.84935E-14             | -38.77             |
| <i>R3hdml</i>        | 2.72895E-18             | -38.74             |
| <i>E530001K10Rik</i> | 6.86106E-14             | -37.17             |
| <i>Trp73os</i>       | 1.78098E-13             | -35.56             |
| <i>Th</i>            | 0.00E+00                | -35.28             |
| <i>Slc16a14</i>      | 2.13928E-33             | -33.95             |

3
